# Supplementary material
Source: PubMed Central journal article supplement (PMC9076583)
Supplement: mmc1.pdf [file mmc1.pdf]

## **Supplementary Appendix**

### **The DisCoVeRy Study Group:**

#### **The French DisCoVeRy Trial Management Team:**

F Ader, Y Yazdanpanah, F Mentre, N Peiffer-Smadja, FX Lescure, J Poissy, L Bouadma, JF Timsit, B Lina, F Morfin-Sherpa, M Bouscambert, A Gaymard, G Peytavin, L Abel, J Guedj, C Andrejak, C Burdet, C Laouenan, D Belhadi, A Dupont, T Alfaiate, B Basli, A Chair, S Laribi, J Level, M Schneider, MC Tellier, A Dechanet, D Costagliola, B Terrier, M Ohana, S Couffin-Cadiergues, H Esperou, C Delmas, J Saillard, C Fougerou, L Moinot, L Wittkop, C Cagnot, S Le Mestre, D Lebrasseur-Longuet, V Petrov-Sanchez, A Diallo, N Mercier, V Icard, B Leveau, S Tubiana, B Hamze, A Gelley, M Noret, E D'Ortenzio, O Puechal, C Semaille.

#### **The DisCoVeRy Steering Committee (members who are not listed in other groups):**

T Welte, JA Paiva, M Halanova, MP Kieny

**ANRS (France Recherche Nord&Sud SIDA-HIV Hépatites), Paris, France:** E Balssa, C Birkle, S Gibowski, E Landry, A Le Goff, L Moachon, C Moins, L Wadouachi, C Paul

**Centre Hospitalier Annecy Genevois, France:** D Bougon

**Centre Hospitalier de Cayenne Andrée Rosemon, Cayenne, France:** F Djossou, L Epelboin

**Centre Hospitalier Universitaire de Nice, France:** J Dellamonica, CH Marquette

**Centre Hospitalier Régional de Metz-Thionville, France:** C Robert

**Centre Hospitalier Régional Universitaire de Nancy, France:** S Gibot

**Centre Hospitalier de Tourcoing, France:** E Senneville, V Jean-Michel

**Centre Hospitalier Universitaire de Amiens, France:** Y Zerbib

**Centre Hospitalier Universitaire de Besançon, France:** C Chirouze

**Centre Hospitalier Universitaire de Bordeaux, France:** A Boyer, C Cazanave, D Gruzon, D Malvy

**Centre Hospitalier Universitaire de Dijon, France:** P Andreu, JP Quenot

**Centre Hospitalier Universitaire de Grenoble Alpes, France:** N Terzi

**Centre Hospitalier Universitaire de Lille, France:** K Faure

**Centre Hospitalier Universitaire de Martinique, Fort-de-France, France:** C Chabartier

**Centre Hospitalier Universitaire de Montpellier, France:** V Le Moing, K Klouche

**Centre Hospitalier Universitaire de Lyon, France:** T Ferry, F, Valour

**Centre Hospitalier Universitaire de Nantes, France:** B Gaborit, E Canet, P Le Turnier, D Boutoille

Supplementary appendix for :

Ader, F. et al. An open-label randomized, controlled trial of the effect of lopinavir/ritonavir, lopinavir/ritonavir plus IFN- $\beta$ -1a and hydroxychloroquine in hospitalized patients with COVID-19 – Final results

---

**Centre Hospitalier Universitaire de Reims, France:** F Bani-Sadr

**Centre Hospitalier Universitaire de Rennes, France:** F Benezit, M Revest, C Cameli, A Caro, MJ Ngo Um Tegue, Y Le Tulzo, B Laviolle, F Laine

**Centre Hospitalier Universitaire de Saint-Étienne, France:** G Thiery

**Centre Hospitalier Universitaire de Strasbourg, France:** F Meziani, Y Hansmann, W Oulehri, C Tacquard

**Centre Hospitalier Universitaire de Toulouse, France:** F Vardon-Bounes, B Riu-Poulenc, M Murriss-Espin

**Centre Hospitalier Universitaire de Tours, France:** L Bernard, D Garot

**Groupe Hospitalier de Mulhouse Sud Alsace, France:** O Hinschberger

**Hospices Civils de Colmar, France:** M Martinot

**Groupe Hospitalier de Paris Saint Joseph, Paris, France:** C Bruel, B Pilmis

**Hôpital Avicenne, Assistance Publique – Hôpitaux de Paris, France:** O Bouchaud

**Centre Hospitalier Universitaire de Nîmes, France:** P Loubet, C Roger

**Hôpital Bicêtre, Assistance Publique – Hôpitaux de Paris, France:** X Monnet, S Figueiredo

**Hôpital Bichat - Claude Bernard, Assistance Publique – Hôpitaux de Paris, France:** V Godard

**Hôpital Cochin, Assistance Publique – Hôpitaux de Paris, France:** JP Mira, M Lachatre, S Kerneis

**Hôpital Delafontaine, Saint-Denis, France:** J Aboab, N Sayre, F Crockett

**Hôpital Européen Georges-Pompidou, Assistance Publique – Hôpitaux de Paris, France:** D Lebeaux, A Buffet, JL Diehl, A Fayol, JS Hulot, M Livrozet

**Hôpital Henri-Mondor, Assistance Publique – Hôpitaux de Paris, France:** A Mekontso-Dessap

**Hôpital d'Instruction des Armées Bégin, Saint Mandé, France:** C Ficko

**Hôpital Marie Lannelongue, Le Plessis Robinson, France:** F Stefan, J Le Pavec

**Hôpital de la Pitié-Salpêtrière, Assistance Publique – Hôpitaux de Paris, France:** J Mayaux

**Hôpital Saint-Antoine, Assistance Publique – Hôpitaux de Paris, France:** H Ait-Oufella

**Hôpital Saint-Louis, Assistance Publique – Hôpitaux de Paris, France:** JM Molina

**Hôpital Tenon, Assistance Publique – Hôpitaux de Paris, France:** G Pialoux, M Fartoukh

**Hospices Civils de Lyon, France:** J Textoris

**Inserm U1018, Université Paris Saclay, CESP, Paris, France:** M Brossard, A Essat

**Inserm US19-Sc10, Université Paris Saclay, Villejuif, France:** E Netzer, Y Riault, M Ghislain

Supplementary appendix for :

Ader, F. et al. An open-label randomized, controlled trial of the effect of lopinavir/ritonavir, lopinavir/ritonavir plus IFN- $\beta$ -1a and hydroxychloroquine in hospitalized patients with COVID-19 – Final results

**Sorbonne Université, INSERM U1136, Institut Pierre Louis d'Épidémiologie et de Santé**

**Publique (IPLESP), Paris, France:** L Beniguel, M Genin

**Cliniques Universitaires de Saint Luc, Bruxelles, Belgique:** L Belkhir

**Centre Hospitalier Régional de la Citadelle, Liège, Belgique:** A Altdorfer, V Fraipont

**Centro Hospital Universitário de Lisboa Norte, Hospital de Santa Maria, Portugal:** S

Braz, JM Ferreira Ribeiro

**Centro Hospitalar Universitário São João de Porto, Portugal:** JA Paiva, R Roncon

Albuquerque

**Hôpitaux Robert Schuman, Luxembourg:** M Berna

**Luxembourg Institute of Health, Strassen, Luxembourg:** M Alexandre

**Kepler Universitätsklinikum Linz, Linz, Austria:** B Lamprecht

**Paracelsus Medical University Salzburg, SCRI-CCCIT and AGMT, Austria:** A Egle, R

Greil

**AGMT Arbeitsgemeinschaft Medikamentöse Tumortherapie, Salzburg, Austria:** R Greil

**Medizinische Universität Innsbruck, Innsbruck, Austria:** M Joannidis

## **Acknowledgements**

We gratefully acknowledge the members of the Data Safety Monitoring Board: Stefano VELLA (chair), Guanhua DU, Donata MEDAGLINI, Mike JACOBS, Sylvie VAN DER WERF, Stuart POCOCK, Phaik Yeong CHEAH, Karen BARNES, Patrick YENI, and the independent statistician Tim COLLIER.

We gratefully acknowledge the chief executive officer of Inserm: Dr. Gilles BLOCH.

We acknowledge the RENARCI network: Marion NORET, Pierre TATTEVIN and Albert SOTTO.

We acknowledge the outstanding support of the Clinical Investigation Centers: Pierre-Olivier GIRODET (CIC1401, Inserm, CHU Bordeaux), Dominique DEPLANQUE (CIC1403, Inserm, CHRU Lille), Jean-Luc CRACOWSKI (CIC1406, Inserm, CHU Grenoble), Michel OVIZE (CIC1407, Inserm, Hospices Civil de Lyon), Bernard TARDY (CIC1408, Inserm, CHU Saint-Etienne), Eric RENARD (CIC1411, Inserm, CHU Montpellier), Jean-Noël TROCHU (CIC1413, Inserm, CHU Nantes), Bruno LAVIOLLE (CIC1414, Inserm, CHU Rennes), Wissam EL HAGE (CIC1415, Inserm, CHU Tours), Odile LAUNAY (CIC1417, Inserm, APHP Cochin), Jean-Sébastien HULOT (CIC1418, Inserm, APHP HEGP), Jean-Christophe CORVOL (CIC1422, Inserm, APHP Pitié-Salpêtrière), Mathieu NACHER (CIC1424, Inserm, CH André Rosemon), André CABIE (CIC1424, Inserm, CHU de la Martinique), Xavier Duval (CIC1425, Inserm, APHP Bichat), Philippe LE CORVOISIER Philippe (CIC1430, Inserm, APHP Mondor), Emmanuel HAFFEN (CIC1431, Inserm, CHU Besançon), Marc BARDOU (CIC1432, Inserm, CHU Dijon), Patrick ROSSIGNOL (CIC1433, Inserm, CHU Nancy), Catherine SCHMIDT-MUTTER (CIC1434, Inserm, CHRU Strasbourg), Olivier RASCOL (CIC1436, Inserm, CHU Toulouse).

We acknowledge the pharmacists: Laure LALANDE (Hospices Civils de Lyon), Marine AUSSÉDAT (Hospices Civils de Lyon), Jennifer LE GRAND (APHP Bichat, PARIS), Laura KRAMER (APHP Bichat, PARIS), Sylvie BRICE (CHRU Lille), Sayah MEGUIG (CHRU Lille), Laurent FLET (CHU Nantes), Martine TCHING-SIN (CHU Nantes), Audrey LEHMANN (CHU Grenoble), Sophie Cerana (CHU Grenoble), Mélanie Minovès (CHU Grenoble), Gwenaël MONNIER (CHU Saint Etienne), Guillaume BECKER (CHRU Strasbourg), Anne HUTT-CLAUSS (CHRU Strasbourg), Sylvia WEHRLÉN-PUGLIESE (CHU Nice), Carine GHIONDA (CHU Nice), Marie-Christine RIGAULT (CHU Nice), Christelle BOCZEK (CHU Nice), Justine BELLEGARDE (CHU Nice), Audrey CASTET-NICOLAS (CHU Montpellier), Jean GALLOT-LAVALLEE (CHU Montpellier), Sophie

Supplementary appendix for :

Ader, F. et al. An open-label randomized, controlled trial of the effect of lopinavir/ritonavir, lopinavir/ritonavir plus IFN- $\beta$ -1a and hydroxychloroquine in hospitalized patients with COVID-19 – Final results

---

JUAREZ (CHU Montpellier), Valérie CARRE (CHU Montpellier), Fanny CHARBONNIER-  
BEAUPEL (APHP Pitié-Salpêtrière), Carole METZ (APHP Pitié-Salpêtrière), MURIEL  
CARVALHO VERLINDE (APHP Mondor), ALAKI THIEMELE (APHP Mondor), delphine  
LE FEBVRE DE NAILLY (APHP Mondor), Magali FARINES RAFFOUL (CH Annecy  
Genevois), Franck GUERIN (CH Annecy Genevois), Bénédicte BONNARD (CH Annecy  
Genevois), Corinne PERNOT (CHU Dijon), Amélie CRANSAC (CHU Dijon), Julie JAMBON  
(CHU Dijon), Julien MORLET (CHU Dijon), Clotilde Le Tiec (APHP Bicêtre), Aurélie Barrail  
Tran (APHP Bicêtre), Renée Flore ROY EMA (APHP Bicêtre), Grégory Rondelot (CHR Metz  
Thionville), Julie Bernez (CHR Metz Thionville), Alexia Hermitte (CHR Metz Thionville),  
Hélène Perraud (CHR Metz Thionville), Julien Voyat (CHR Metz Thionville), Laurence Ferrier  
(CHR Metz Thionville), Julie Alips (CHR Metz Thionville), Sarah Di-Filippo (CHR Metz  
Thionville), Florence Beringuer (CHR Metz Thionville), Michel PREVOT (CHRU Nancy),  
Sophie MORICE (CHRU Nancy), Brigitte SABATIER (APHP HEGP), Dominique  
ROUSSEAU (APHP HEGP), Marie KROEMER (CHRU Besançon), Julie VARDANEGA  
(CHRU Besançon), Magalie VIEILLE (CHRU Besançon), Karen GEORGE (GHR Mulhouse  
Sud Alsace), Marion TISSOT (GHR Mulhouse Sud Alsace), Laetitia ARNOUX (GHR  
Mulhouse Sud Alsace), Marjorie BRIMBOEUF (GHR Mulhouse Sud Alsace), Philippe  
BENOIT (CHU Reims), Frédéric EYVRARD (CHU Toulouse), Caroline SORLI (CHU  
Toulouse), Corinne GUERIN (APHP Cochin), Jeremie ZERBIT (APHP Cochin),  
MERIAM JARDIN SUZCS (HPJS), SOPHIE RENET (HPJS), Alix DE CHEVIGNY (HPJS),  
Anne Daguanel-Nguyen (APHP Saint-Antoine), Clementine Mayala Kanda (APHP Saint-  
Antoine), Catherine HAMON-BOUER (CHU Rennes), Pascal LE CORRE (CHU Rennes),  
Valentine JASPART-LE DU (CHU Rennes), Roza WILSON (CHU Rennes), Sophie  
BODDAERT (CHU Amiens), Florian SMAGGHE (CHU Amiens), Mickael DELAUNAY  
(CHU Amiens), Véronique Dubar (CH Tourcoing), Adeline Danielou (CH Tourcoing),  
Ghezzoul BELLABES (CHU Bordeaux), Salima ALLAF (APHP Tenon), Jean-Baptiste PAIN  
(APHP Tenon), Nina DURET-AUPY (CHU Tours), Hélène BOURGOIN (CHU Tours),  
Thierno DIEYE (Hopital Delafontaine), Anais RAZUREL (Hopital Delafontaine), Jean-Louis  
LAMAIGNERE (CHU Martinique), Aurélie RISAL (CHU Martinique), Amandine  
SGARIOTO (Hôpital des Armées Begin), Claire DAVOINE (APHP Hôpital Saint-Louis),  
Vanessa RATHOUIN (Hôpital Avicenne), Blaise NICAISE (CH Andrée Rosemon), Gregory  
Gaudillot (CHL, Luxembourg), Emmanuelle Andlauer-Vialette (CHL, Luxembourg), Anne  
OTTO (HRS, Luxembourg), Françoise FRANTZEN (HRS, Luxembourg), Nathalie BART  
(HRS, Luxembourg), Martin Wolkersdorfer (Landeskrankenhaus, Salzburg), Astrid Vandorpe

Supplementary appendix for :

Ader, F. et al. An open-label randomized, controlled trial of the effect of lopinavir/ritonavir, lopinavir/ritonavir plus IFN- $\beta$ -1a and hydroxychloroquine in hospitalized patients with COVID-19 – Final results

(Hôpital Erasme, Bruxelles), Axelle Scarnière (Hôpital Erasme, Bruxelles), Kristel Marquez (Hôpital Erasme, Bruxelles), Nathalie Mathonet (Hôpital Erasme, Bruxelles), Robert Rugwiro (Hôpital Erasme, Bruxelles), Jarode Ducrot (Hôpital Erasme, Bruxelles), Florence Vandenberghe (Hôpital Erasme, Bruxelles), Alexa Jonas (CHR Citadelle, Liège), Valentine Lesenfant (CHR Citadelle, Liège), Blaise Delhauteur (CHR Citadelle, Liège), Annick Peters (CHR Citadelle, Liège), Thi Nguyen (CHR Citadelle, Liège), Jean-François Gouders (CHR Citadelle, Liège), Grégory Opeind (CHR Citadelle, Liège), Adeline GAILLET (Cliniques universitaires Saint Luc, Bruxelles), Ana Carrondo (CHU Lisboa Norte, Hospital Santa Maria, Lisboa), Daniela Ramos (CHU Lisboa Norte, Hospital Santa Maria, Lisboa), Vanessa Côdea (CHU Lisboa Norte, Hospital Santa Maria, Lisboa), Raquel Carneiro (CHU Lisboa Norte, Hospital Santa Maria, Lisboa), Ana Lima (CHU Lisboa Norte, Hospital Santa Maria, Lisboa), Tatiana Bento (CHU Lisboa Norte, Hospital Santa Maria, Lisboa).

We thank the pharmacologists: Marie-Claude Gagneu (CHU Lyon), Minh Lê and Gilles Peytavin (CHU Bichat), Benjamin Hennart (CHU Lille), Matthieu Grégoire (CHU Nantes), Françoise Stanke (CHU Grenoble), Xavier Delavenne (CHU Saint-Etienne), Véronique Kimmel (CHU Strasbourg), Noël Zahr (CHU Pitié-Salpêtrière), Patrice Muret (CHU Besançon), Jean-Yves Jouzeau and Nicolas Gambier (CHU Nancy), Rodolphe Garraffo (CHU Nice), Juliette Descoeur (CHU Montpellier), Valérie Furlan (CHU Bicêtre), Peggy Gandia (CHU Toulouse), Jean-Marc Tréluyer (CHU Cochin), Florian Lemaître (CHU Rennes), Anne-Sophie Hurtel-Lemaire, Youssef Bennis and Sandra Bodeau (CHU Amiens), Gilles Paintaud and François Darrouzain (CHU Tours).

We acknowledge the following individuals from the French Data Management Team of Discovery:

Drug supply: Johanna GUILLON, Anne-Marie TABURET.

Inserm-Transfert: Pascale AUGÉ, Mireille CARALP, Nathalie DUGAS, Florence CHUNG, Julia LUMBROSO.

Clinical Research Unit CHU Bichat-Claude Bernard: Camille COUFFIGNAL.

We thank all the staff members involved in data monitoring.

We thank the COVID-19 Partners Platform and Hervé Le Nagard for data hosting.

We thank Theradis PHARMA, Cagnes-sur-Mer, France.

This study was conducted with the support of GILEAD, SANOFI, MERCK and ABBVIE that provided the study drugs.
